# Supplementary material for: Absence of Staphylococcus aureus in Wild Populations of Fish Supports a Spillover Hypothesis
Source: PubMed Central journal article supplement (PMC10434045; doi:10.1128/spectrum.04858-22), 2023-06-21
Supplement: spectrum.04858-22-s0001.pdf [file spectrum.04858-22-s0001.pdf]

**Table S2: MIC values obtained using Vitek2 for two rainbow trout isolates from fish farm in London.**

| <i>Antibiotic</i>                      | <i>BTGL0319001</i> | <i>BTIL0319003</i> |
|----------------------------------------|--------------------|--------------------|
| Cefoxitin Screen                       | NEG                | NEG                |
| Benzylpenicillin                       | $\geq 0.5$         | $\geq 0.5$         |
| Amoxicillin/ Clavulanic acid           | $\leq 2$           | $\leq 2$           |
| Oxacillin                              | $\leq 0.25$        | $\leq 0.25$        |
| Cefalotin                              | $\leq 2$           | $\leq 2$           |
| Cefovecin                              | 1                  | 1                  |
| Ceftiofur                              | 1                  | 1                  |
| Gentamicin                             | $\leq 0.5$         | $\leq 0.5$         |
| Kanamycin                              | $\leq 4$           | $\leq 4$           |
| Neomycin                               | $\leq 2$           | $\leq 2$           |
| Enrofloxacin                           | $\leq 0.5$         | $\leq 0.5$         |
| Marbofloxacin                          | $\leq 0.5$         | $\leq 0.5$         |
| Pradofloxacin                          | $\leq 0.12$        | $\leq 0.12$        |
| Inducible Clindamycin Resistance (ICR) | NEG                | NEG                |
| Erythromycin                           | $\leq 0.25$        | $\leq 0.25$        |
| Clindamycin                            | 0.25               | 0.25               |
| Doxycycline                            | $\leq 0.5$         | $\leq 0.5$         |
| Tetracycline                           | $\leq 1$           | $\leq 1$           |
| Nitrofurantoin                         | 32                 | 32                 |
| Chloramphenicol                        | 8                  | $\leq 4$           |
| Trimethoprim / Sulfamethoxazole        | $\leq 10$          | $\leq 10$          |
