# Supplementary material for: Absence of Staphylococcus aureus in Wild Populations of Fish Supports a Spillover Hypothesis
Source: PubMed Central journal article supplement (PMC10434045; doi:10.1128/spectrum.04858-22), 2023-06-21
Supplement: spectrum.04858-22-s0002.pdf [file spectrum.04858-22-s0002.pdf]

**Table S3: Sampled lochs with sizes, coordinates.**

| <i>Sampling site</i>   | <i>Location</i> | <i>Loch code</i> | <i>Perimeter (km)</i> | <i>Area (ha)</i> | <i>Altitude (m)</i> | <i>Habitat</i> | <i>Sampling date</i> |
|------------------------|-----------------|------------------|-----------------------|------------------|---------------------|----------------|----------------------|
| Loch a'Gharbh Doire    | N57°44'52"      | LGD              | 1.69                  | 10.98            | 82                  | Bird           | 13 JUL 2019          |
|                        | W5°41'51"       |                  |                       |                  |                     |                |                      |
| Loch Coire na h-Airigh | N57°44'29"      | LCA              | 0.78                  | 2.23             | 80                  | Bird           | 13 JUL 2019          |
|                        | W5°41'25"       |                  |                       |                  |                     |                |                      |
| Loch Feur              | N57°44'21"      | LFE              | 1.16                  | 4.55             | 75                  | Bird           | 13 JUL 2019          |
|                        | W5°40'57"       |                  |                       |                  |                     |                |                      |
| Loch nam Breac         | N57°44'27"      | LNB              | 1.02                  | 4.95             | 77                  | Bird           | 13 JUL 2019          |
|                        | W5°40'30"       |                  |                       |                  |                     |                |                      |
| Greylag Loch           | N57°54'40"      | GRB              | 0.97                  | 4.83             | 21                  | Bird           | 14 JUL 2019          |
|                        | W5°33'36"       |                  |                       |                  |                     |                |                      |
| Loch Orchid            | N57°37'47"      | GLO              | 0.44                  | 0.87             | 374                 | Isolated       | 12 JUL 2019          |
|                        | W5°16'55"       |                  |                       |                  |                     |                |                      |
| Golden Loch A          | N57°37'46"      | LFO              | 0.63                  | 1.61             | 420                 | Isolated       | 12 JUL 2019          |
|                        | W5°17'56"       |                  |                       |                  |                     |                |                      |
| Golden Loch B          | N57°37'44"      | LFI              | 0.75                  | 1                | 400                 | Isolated       | 12 JUL 2019          |
|                        | W5°17'29"       |                  |                       |                  |                     |                |                      |
| Loch Dubh Dughaill     | N57°42'18"      | LDD              | 0.73                  | 1.66             | 293                 | Isolated       | 15 JUL 2019          |
|                        | W5°36'02"       |                  |                       |                  |                     |                |                      |
| Loch na Feithe Mugaig  | N57°42'42"      | LFM              | 3.65                  | 16.27            | 306                 | Isolated       | 15 JUL 2019          |
|                        | W5°35'46"       |                  |                       |                  |                     |                |                      |
| Loch nan Buainichean   | N57°42'01"      | LB               | 2.1                   | 11.13            | 204                 | Isolated       | 15 JUL 2019          |
|                        | W5°36'14"       |                  |                       |                  |                     |                |                      |
| Loch an Draing         | N57°51'08"      | LDR              | 3.16                  | 38               | 41                  | Livestock      | 11 JUL 2019          |
|                        | W5°45'10"       |                  |                       |                  |                     |                |                      |

|                                     |                                            |     |      |       |     |           |             |
|-------------------------------------|--------------------------------------------|-----|------|-------|-----|-----------|-------------|
| Loch nan Eun                        | N57°51'16"<br>W5°45'19"                    | LEV | 2.15 | 16.46 | 40  | Livestock | 11 JUL 2019 |
| Loch na Fideil                      | N57°40'15"<br>W5°28'45"                    | LNF | 0.62 | 2.5   | 21  | Livestock | 17 JUL 2019 |
| Loch Beag nan Eun                   | N57°51'30"                                 | LBE | 0.34 | 0.78  | 42  | Livestock | 19 JUL 2019 |
| Loch Bad an Scalaig                 | W5°45'39"<br>N57°41'11.12"<br>W5°36'42.22" | LBS |      |       | 114 | NA        | 22 JUL 2019 |
| Allt Phadraig                       | N57°46'44"<br>W5°48'00"                    | APD |      |       |     | NA        | 19 JUL 2019 |
| Kerrysdale (River Kerry B8056 A832) | N57°41'35.34"<br>W5°39'27.41"              | KED |      |       | 24  | NA        | 22 JUL 2019 |
| Pollack Point                       | N57°54'45"<br>W5°33'05"                    | SPP | NA   | NA    | NA  | Sea       | 14 JUL 2019 |
| Mellon Udrigle Bay                  | N57°54'12"<br>W5°33'22"                    | MUB | NA   | NA    | NA  | Sea       | 14 JUL 2019 |
| River Canaird                       | N57°56'50"                                 | RCA | NA   | NA    | NA  | Sea       | 16 JUL 2019 |
| Sand River                          | W5°10'48"<br>N57°44'25"<br>W5°46'19"       | SR  | NA   | NA    | NA  | Sea       | 21 JUL 2019 |
| Flowerdale Estuary                  | N57°42'44"<br>W5°40'43"                    | FES | NA   | NA    | NA  | Sea       | 20 JUL 2019 |
| Sand Beach Ocean                    | N57°44'11"<br>W5°46'07"                    | SBO | NA   | NA    | NA  | Sea       | 21 JUL 2019 |

---
