# Supplementary material for: Absence of Staphylococcus aureus in Wild Populations of Fish Supports a Spillover Hypothesis
Source: PubMed Central journal article supplement (PMC10434045; doi:10.1128/spectrum.04858-22), 2023-06-21
Supplement: spectrum.04858-22-s0003.pdf [file spectrum.04858-22-s0003.pdf]

**Table S4: Metadata for all samples collected from fish in Scottish Highlands. The loch code corresponds to names in the Table S3.**

| <i>Sample name</i> | <i>Tissue sampled</i> | <i>Loch code</i> | <i>Habitat</i> | <i>Host</i> | <i>Date of sampling</i> |
|--------------------|-----------------------|------------------|----------------|-------------|-------------------------|
| BTG_LNB0719_001    | Gills                 | LNB              | Bird Lochs     | Brown Trout | 9 JUL 2019              |
| BTG_LNB0719_002    | Gills                 | LNB              | Bird Lochs     | Brown Trout | 9 JUL 2019              |
| BTG_LNB0719_003    | Gills                 | LNB              | Bird Lochs     | Brown Trout | 9 JUL 2019              |
| BTG_LNB0719_004    | Gills                 | LNB              | Bird Lochs     | Brown Trout | 9 JUL 2019              |
| BTG_LNB0719_005    | Gills                 | LNB              | Bird Lochs     | Brown Trout | 9 JUL 2019              |
| BTG_LNB0719_006    | Gills                 | LNB              | Bird Lochs     | Brown Trout | 9 JUL 2019              |
| BTG_LNB0719_007    | Gills                 | LNB              | Bird Lochs     | Brown Trout | 9 JUL 2019              |
| BTG_LNB0719_008    | Gills                 | LNB              | Bird Lochs     | Brown Trout | 9 JUL 2019              |
| BTG_LNB0719_009    | Gills                 | LNB              | Bird Lochs     | Brown Trout | 9 JUL 2019              |
| BTG_LNB0719_010    | Gills                 | LNB              | Bird Lochs     | Brown Trout | 9 JUL 2019              |
| BTV_LNB0719_001    | Vent                  | LNB              | Bird Lochs     | Brown Trout | 9 JUL 2019              |
| BTV_LNB0719_002    | Vent                  | LNB              | Bird Lochs     | Brown Trout | 9 JUL 2019              |
| BTV_LNB0719_003    | Vent                  | LNB              | Bird Lochs     | Brown Trout | 9 JUL 2019              |
| BTV_LNB0719_004    | Vent                  | LNB              | Bird Lochs     | Brown Trout | 9 JUL 2019              |
| BTV_LNB0719_005    | Vent                  | LNB              | Bird Lochs     | Brown Trout | 9 JUL 2019              |
| BTV_LNB0719_006    | Vent                  | LNB              | Bird Lochs     | Brown Trout | 9 JUL 2019              |
| BTV_LNB0719_007    | Vent                  | LNB              | Bird Lochs     | Brown Trout | 9 JUL 2019              |
| BTV_LNB0719_008    | Vent                  | LNB              | Bird Lochs     | Brown Trout | 9 JUL 2019              |
| BTV_LNB0719_009    | Vent                  | LNB              | Bird Lochs     | Brown Trout | 9 JUL 2019              |
| BTV_LNB0719_010    | Vent                  | LNB              | Bird Lochs     | Brown Trout | 9 JUL 2019              |
| BTG_LGD0719_001    | Gills                 | LGD              | Bird Lochs     | Brown Trout | 10 JUL 2019             |
| BTG_LGD0719_002    | Gills                 | LGD              | Bird Lochs     | Brown Trout | 10 JUL 2019             |
| BTG_LGD0719_003    | Gills                 | LGD              | Bird Lochs     | Brown Trout | 10 JUL 2019             |
| BTG_LGD0719_004    | Gills                 | LGD              | Bird Lochs     | Brown Trout | 10 JUL 2019             |
| BTG_LGD0719_005    | Gills                 | LGD              | Bird Lochs     | Brown Trout | 10 JUL 2019             |
| BTG_LGD0719_006    | Gills                 | LGD              | Bird Lochs     | Brown Trout | 10 JUL 2019             |
| BTG_LGD0719_007    | Gills                 | LGD              | Bird Lochs     | Brown Trout | 10 JUL 2019             |
| BTG_LGD0719_008    | Gills                 | LGD              | Bird Lochs     | Brown Trout | 10 JUL 2019             |
| BTG_LGD0719_009    | Gills                 | LGD              | Bird Lochs     | Brown Trout | 10 JUL 2019             |
| BTG_LGD0719_010    | Gills                 | LGD              | Bird Lochs     | Brown Trout | 10 JUL 2019             |
| BTG_LGD0719_011    | Gills                 | LGD              | Bird Lochs     | Brown Trout | 10 JUL 2019             |
| BTV_LGD0719_001    | Vent                  | LGD              | Bird Lochs     | Brown Trout | 10 JUL 2019             |
| BTV_LGD0719_002    | Vent                  | LGD              | Bird Lochs     | Brown Trout | 10 JUL 2019             |
| BTV_LGD0719_003    | Vent                  | LGD              | Bird Lochs     | Brown Trout | 10 JUL 2019             |
| BTV_LGD0719_004    | Vent                  | LGD              | Bird Lochs     | Brown Trout | 10 JUL 2019             |
| BTV_LGD0719_005    | Vent                  | LGD              | Bird Lochs     | Brown Trout | 10 JUL 2019             |
| BTV_LGD0719_006    | Vent                  | LGD              | Bird Lochs     | Brown Trout | 10 JUL 2019             |
| BTV_LGD0719_007    | Vent                  | LGD              | Bird Lochs     | Brown Trout | 10 JUL 2019             |
| BTV_LGD0719_008    | Vent                  | LGD              | Bird Lochs     | Brown Trout | 10 JUL 2019             |
| BTV_LGD0719_009    | Vent                  | LGD              | Bird Lochs     | Brown Trout | 10 JUL 2019             |
| BTV_LGD0719_010    | Vent                  | LGD              | Bird Lochs     | Brown Trout | 10 JUL 2019             |
| BTV_LGD0719_011    | Vent                  | LGD              | Bird Lochs     | Brown Trout | 10 JUL 2019             |
| BTG_LCA0719_001    | Gills                 | LCA              | Bird Lochs     | Brown Trout | 13 JUL 2019             |
| BTG_LCA0719_002    | Gills                 | LCA              | Bird Lochs     | Brown Trout | 13 JUL 2019             |
| BTG_LCA0719_003    | Gills                 | LCA              | Bird Lochs     | Brown Trout | 13 JUL 2019             |
| BTG_LCA0719_004    | Gills                 | LCA              | Bird Lochs     | Brown Trout | 13 JUL 2019             |
| BTG_LCA0719_005    | Gills                 | LCA              | Bird Lochs     | Brown Trout | 13 JUL 2019             |
| BTG_LCA0719_006    | Gills                 | LCA              | Bird Lochs     | Brown Trout | 13 JUL 2019             |
| BTG_LCA0719_007    | Gills                 | LCA              | Bird Lochs     | Brown Trout | 13 JUL 2019             |
| BTG_LCA0719_008    | Gills                 | LCA              | Bird Lochs     | Brown Trout | 13 JUL 2019             |
| BTG_LCA0719_009    | Gills                 | LCA              | Bird Lochs     | Brown Trout | 13 JUL 2019             |
| BTG_LCA0719_010    | Gills                 | LCA              | Bird Lochs     | Brown Trout | 13 JUL 2019             |
| BTG_LCA0719_011    | Gills                 | LCA              | Bird Lochs     | Brown Trout | 13 JUL 2019             |
| BTV_LCA0719_001    | Vent                  | LCA              | Bird Lochs     | Brown Trout | 13 JUL 2019             |
| BTV_LCA0719_002    | Vent                  | LCA              | Bird Lochs     | Brown Trout | 13 JUL 2019             |







|                 |       |     |                 |             |             |
|-----------------|-------|-----|-----------------|-------------|-------------|
| BTV_LEV0719_014 | Vent  | LEV | Livestock Lochs | Brown Trout | 19 JUL 2019 |
| BTV_LEV0719_015 | Vent  | LEV | Livestock Lochs | Brown Trout | 19 JUL 2019 |
| BTV_LEV0719_016 | Vent  | LEV | Livestock Lochs | Brown Trout | 19 JUL 2019 |
| BTV_LEV0719_017 | Vent  | LEV | Livestock Lochs | Brown Trout | 19 JUL 2019 |
| BTV_LEV0719_018 | Vent  | LEV | Livestock Lochs | Brown Trout | 19 JUL 2019 |
| BTG_RSA0719_001 | Gills | RCA | Sea             | Brown Trout | 16 JUL 2019 |
| BTG_RSA0719_002 | Gills | RCA | Sea             | Brown Trout | 16 JUL 2019 |
| BTG_SRI0719_001 | Gills | SR  | Sea             | Brown Trout | 18 JUL 2019 |
| BTV_RSA0719_001 | Vent  | RCA | Sea             | Brown Trout | 16 JUL 2019 |
| BTV_RSA0719_002 | Vent  | RCA | Sea             | Brown Trout | 16 JUL 2019 |
| BTV_SRI0719_001 | Vent  | SR  | Sea             | Brown Trout | 18 JUL 2019 |

---
