# Supplementary material for: Absence of Staphylococcus aureus in Wild Populations of Fish Supports a Spillover Hypothesis
Source: PubMed Central journal article supplement (PMC10434045; doi:10.1128/spectrum.04858-22), 2023-06-21
Supplement: spectrum.04858-22-s0004.pdf [file spectrum.04858-22-s0004.pdf]

**Table S5: Metadata for all environmental samples collected in Scottish Highlands. The loch code corresponds to names in the Table S3.**

| <i>Loch code</i> | <i>Habitat</i>          | <i>Date of sampling</i> |
|------------------|-------------------------|-------------------------|
| LGD              | Bird                    | 13_JUL_2019             |
| LCA              | Bird                    | 13_JUL_2019             |
| LFE              | Bird                    | 13_JUL_2019             |
| LNB              | Bird                    | 13_JUL_2019             |
| GRB              | Bird                    | 14_JUL_2019             |
| GLO              | Isolated                | 12_JUL_2019             |
| LFO              | Isolated                | 12_JUL_2019             |
| LFI              | Isolated                | 12_JUL_2019             |
| LMG              | Isolated                | 12_JUL_2019             |
| LDD              | Isolated                | 15_JUL_2019             |
| LFM              | Isolated                | 15_JUL_2019             |
| LB               | Isolated                | 15_JUL_2019             |
| LDR              | Livestock               | 11_JUL_2019             |
| LEU              | Livestock               | 11_JUL_2019             |
| LNF              | Livestock               | 17_JUL_2019             |
| LBE              | Livestock               | 19_JUL_2019             |
| LBS              | Loch Additional sample  | 22_JUL_2019             |
| APD              | River Additional sample | 19_JUL_2019             |
| KED              | River Additional sample | 22_JUL_2019             |
| SPP              | Sea                     | 14_JUL_2019             |
| MUB              | Sea                     | 14_JUL_2019             |
| RCA              | Sea                     | 16_JUL_2019             |
| SR               | Sea                     | 21_JUL_2019             |
| FES              | Sea                     | 20_JUL_2019             |
| SBO              | Sea                     | 21_JUL_2019             |
