# Supplementary material for: Absence of Staphylococcus aureus in Wild Populations of Fish Supports a Spillover Hypothesis
Source: PubMed Central journal article supplement (PMC10434045; doi:10.1128/spectrum.04858-22), 2023-06-21
Supplement: spectrum.04858-22-s0005.pdf [file spectrum.04858-22-s0005.pdf]

**Table S6 Metadata and Sample Accession for all the isolates used in this study.**

| <i>Strain</i> | <i>Sampling site</i> | <i>Sampling type</i> | <i>ST</i> | <i>CC</i> | <i>Sample Accession</i> | <i>ERR number</i> |
|---------------|----------------------|----------------------|-----------|-----------|-------------------------|-------------------|
| BTIL0319_003  | Intestine            | Swabbing             | 54        | 45        | SAMEA5419346            | ERR4188682        |
| BLSL0319_003  | Skin                 | Swabbing             | 54        | 45        | SAMEA5419347            | ERR4188685        |
| BLGL0319_003  | Gill                 | Tissue               | 54        | 45        | SAMEA5419348            | ERR4188688        |
| BTIL0319_001  | Intestine            | Tissue               | 54        | 45        | SAMEA5419349            | ERR4188691        |
| BLGL0319_002  | Gill                 | Swabbing             | 54        | 45        | SAMEA5419350            | ERR4188694        |
| BLSL0319_002  | Skin                 | Swabbing             | 54        | 45        | SAMEA5419351            | ERR4188697        |
| BLGL0319_004  | Gill                 | Tissue               | 54        | 45        | SAMEA5419352            | ERR4188700        |
| BLSL0319_004  | Skin                 | Tissue               | 54        | 45        | SAMEA5419353            | ERR4188703        |
| BTIL0319_004  | Intestine            | Tissue               | 54        | 45        | SAMEA5419354            | ERR4188705        |
| BTIL0319_002  | Intestine            | Swabbing             | 54        | 45        | SAMEA5419355            | ERR4188708        |
| BLGL0319_001  | Gill                 | Swabbing             | 54        | 45        | SAMEA5419356            | ERR4188711        |
| BLSL0319_001  | Skin                 | Tissue               | 54        | 45        | SAMEA5419357            | ERR4188714        |
