# Supplementary material for: Absence of Staphylococcus aureus in Wild Populations of Fish Supports a Spillover Hypothesis
Source: PubMed Central journal article supplement (PMC10434045; doi:10.1128/spectrum.04858-22), 2023-06-21
Supplement: spectrum.04858-22-s0006.pdf [file spectrum.04858-22-s0006.pdf]

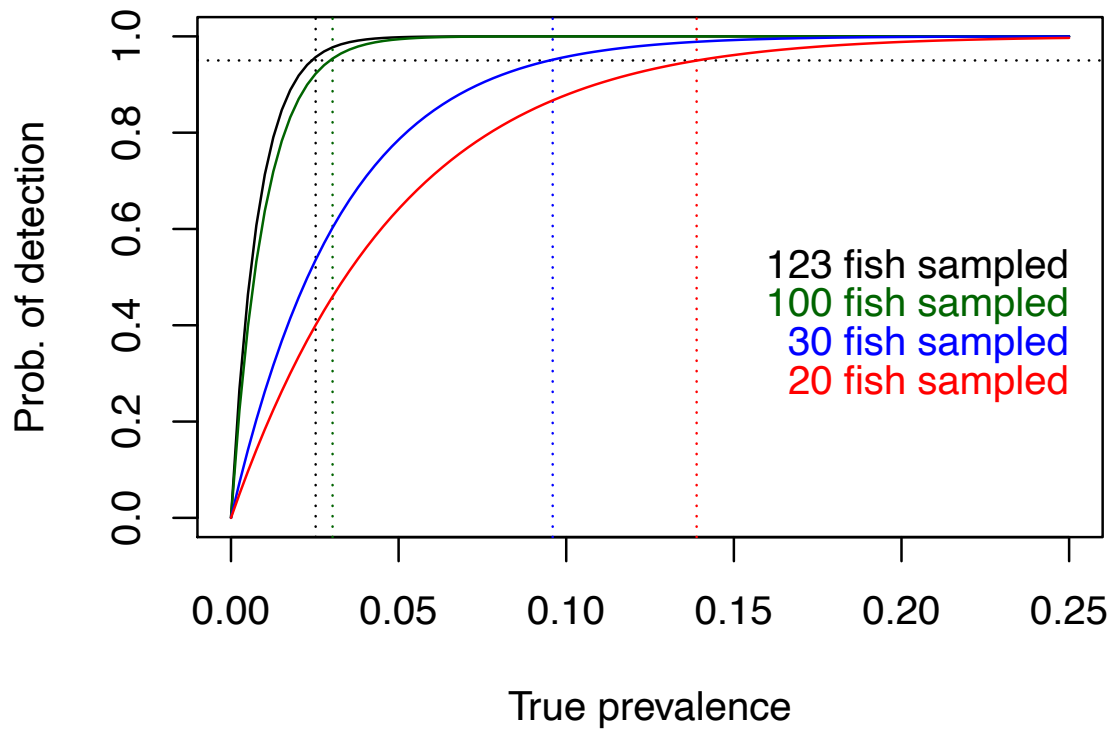

**Figure S1: The probability of detecting one or more positive *S. aureus* isolate from fish samples (y axis), given differences in the true prevalence (x axis). The coloured lines correspond to different numbers of fish samples. For example, 20 fish samples gives a 95% chance of detecting one or more positive *S. aureus* isolate if the true prevalence is around 0.14.**
