# Supplementary material for: Absence of Staphylococcus aureus in Wild Populations of Fish Supports a Spillover Hypothesis
Source: PubMed Central journal article supplement (PMC10434045; doi:10.1128/spectrum.04858-22), 2023-06-21
Supplement: spectrum.04858-22-s0007.pdf [file spectrum.04858-22-s0007.pdf]

**Table S1: Metadata for all CC45 *S. aureus* used in the phylogenetic reconstruction analysis.**

| <i>Strain</i> | <i>County</i>  | <i>Host</i>  | <i>ST</i> | <i>CC</i> | <i>ERR number</i> |
|---------------|----------------|--------------|-----------|-----------|-------------------|
| 09.4504.Z     | United Kingdom | Human        | 45        | 45        | ERR084607         |
| 4238_1_1      | Belgium        | Human        | 45        | 45        | ERR033239         |
| 4238_1_10     | Belgium        | Human        | 45        | 45        | ERR033240         |
| 4238_1_7      | Belgium        | Human        | 45        | 45        | ERR033248         |
| 4238_1_8      | Belgium        | Human        | 45        | 45        | ERR033249         |
| 4330_8_1      | Austria        | Human        | 45        | 45        | ERR033304         |
| 4340_5_1      | Bulgaria       | Human        | 45        | 45        | ERR033330         |
| 4340_6_1      | Belgium        | Human        | 45        | 45        | ERR033343         |
| 4350_1_6      | Czech          | Human        | 45        | 45        | ERR033364         |
| 4386_1_11     | Croatia        | Human        | 45        | 45        | ERR033410         |
| 4386_1_2      | Croatia        | Human        | 45        | 45        | ERR033412         |
| 4386_1_3      | Cyprus         | Human        | 45        | 45        | ERR033413         |
| 4386_1_5      | Croatia        | Human        | 45        | 45        | ERR033415         |
| 4386_7_4      | Germany        | Human        | 45        | 45        | ERR033479         |
| 4395_3_11     | Spain          | Human        | 45        | 45        | ERR033526         |
| 4414_2_10     | Poland         | Human        | 45        | 45        | ERR033551         |
| 4414_2_6      | Poland         | Human        | 45        | 45        | ERR033558         |
| 4414_3_10     | Sweden         | Human        | 45        | 45        | ERR033564         |
| 4414_3_11     | Sweden         | Human        | 45        | 45        | ERR033565         |
| 4414_3_12     | Sweden         | Human        | 45        | 45        | ERR033566         |
| 4414_3_3      | Sweden         | Human        | 45        | 45        | ERR033568         |
| 4414_5_10     | Sweden         | Human        | 45        | 45        | ERR033577         |
| 4414_5_4      | Sweden         | Human        | 45        | 45        | ERR033582         |
| 4414_5_6      | Sweden         | Human        | 45        | 45        | ERR033584         |
| 4414_6_3      | Sweden         | Human        | 45        | 45        | ERR033594         |
| 4414_6_6      | Sweden         | Human        | 45        | 45        | ERR033597         |
| 4430_1_1      | Denmark        | Human        | 45        | 45        | ERR033628         |
| 4465_5_4      | Norway         | Human        | 45        | 45        | ERR033712         |
| 6133_3_5      | Poland         | Human        | 45        | 45        | ERR038686         |
| 6133_3_8      | Poland         | Human        | 45        | 45        | ERR038689         |
| 6236_1_4      | Austria        | Human        | 45        | 45        | ERR039391         |
| A-69          | Turkey         | Cow          | 45        | 45        | ERR387222         |
| B302368       | United Kingdom | Wild<br>Bird | 45        | 45        | ERR2505672        |
| CSRJAE39      | Switzerland    | Horse        | 45        | 45        | ERR234859         |
| CTH14         | USA            | Cow          | 45        | 45        | ERR2505706        |
| CTH160        | USA            | Cow          | 45        | 45        | ERR2505707        |
| CTH211        | USA            | Cow          | 45        | 45        | ERR2505703        |
| Z_22          | Denmark        | Horse        | 45        | 45        | ERR2505688        |
| 4414_5_8      | Sweden         | Human        | 46        | 45        | ERR033586         |
| 4415_2_8      | United Kingdom | Human        | 46        | 45        | ERR033612         |

|           |                |       |      |    |            |
|-----------|----------------|-------|------|----|------------|
| ASASM145  | United Kingdom | Human | 47   | 45 | ERR109591  |
| ASASM300  | United Kingdom | Human | 54   | 45 | ERR114905  |
| ASASM325  | United Kingdom | Human | 508  | 45 | ERR114924  |
| SA21      | Gambia         | Human | 508  | 45 | ERR1213778 |
| 4386_2_1  | Denmark        | Human | 682  | 45 | ERR033421  |
| 4350_1_7  | Czech          | Human | 2860 | 45 | ERR033365  |
| 4386_2_6  | Denmark        | Human | 2863 | 45 | ERR033429  |
| 6133_1_12 | France         | Human | 2876 | 45 | ERR038669  |
| ASASM17   | United Kingdom | Human | 2902 | 45 | ERR109499  |
| ASASM158  | United Kingdom | Human | 2903 | 45 | ERR109571  |
| ASASM356  | United Kingdom | Human | 2904 | 45 | ERR109683  |
| ASASM171  | United Kingdom | Human | 2927 | 45 | ERR109616  |
| ASASM426  | United Kingdom | Human | 2940 | 45 | ERR172064  |
| 4330_8_4  | Belgium        | Human | 3299 | 45 | ERR033310  |
| 45-164    | United Kingdom | Cow   | 3613 | 45 | ERR294319  |
| 4350_1_4  | Czech          | Human | 4670 | 45 | ERR033362  |

---
